# Supplementary material for: Understanding the catalysis of noble metals in reduction of iron oxide by hydrogen: insights from DFT calculations
Source: Royal Society of Chemistry journal article supplement (doi:10.1039/d4ta04793a), 2024-01-01
Supplement: d4ta04793a1.pdf [file d4ta04793a1.pdf]

## Supporting Information

# **Understanding the Catalysis of Noble Metals in Reduction of Iron Oxide by Hydrogen: Insights from DFT Calculations**

*Qiming Tang,<sup>1</sup> Xueling Lei<sup>2\*</sup>, Yongliang Zhang<sup>1</sup>, Jiabin Lu<sup>1</sup>, Kevin Huang<sup>1\*</sup>*

<sup>1</sup> Department of Mechanical Engineering, University of South Carolina, Columbia, SC 29201,  
USA

<sup>2</sup> Department of Physics, Jiangxi Normal University, Nanchang, Jiangxi 330022, China.

\*Corresponding author: e-mail: [huang46@cec.sc.edu](mailto:huang46@cec.sc.edu) [xueling@mail.ustc.edu.cn](mailto:xueling@mail.ustc.edu.cn)

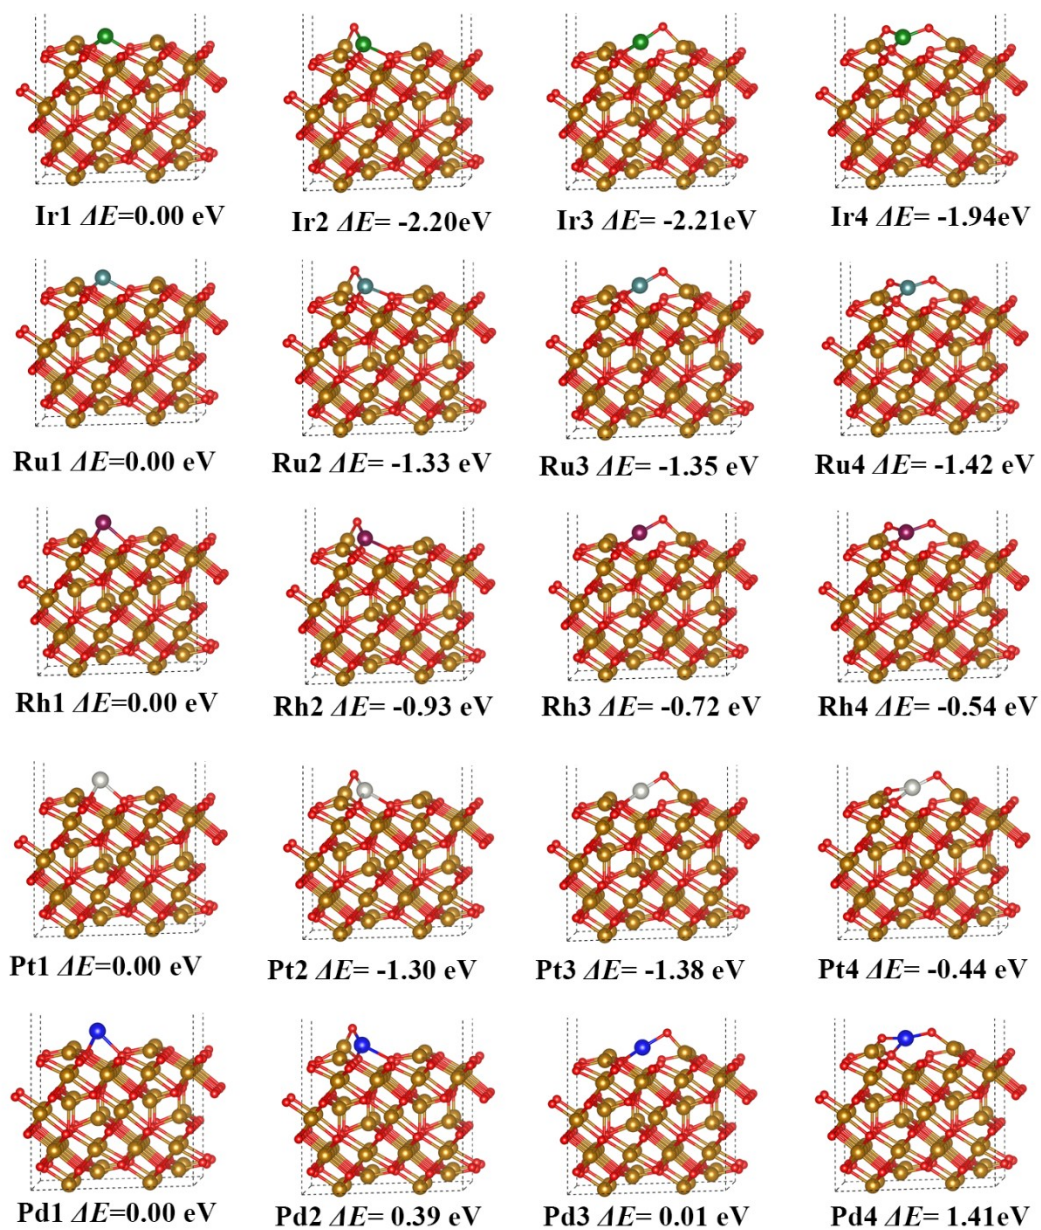

Figure S1. Optimized structures along with the relative energies for different noble metal (NM) on the substrate.

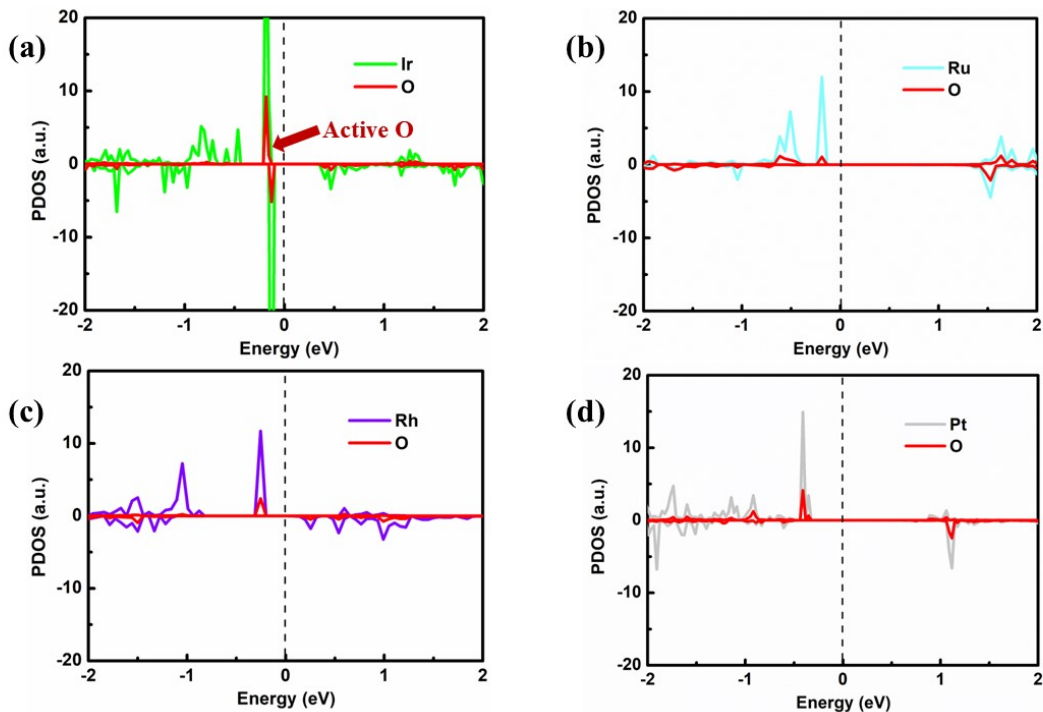

Figure S2. Projected density of states of noble metals and active oxygen after introducing noble metals in  $\text{Fe}_3\text{O}_4$ : (a) Ir/ $\text{Fe}_3\text{O}_4$ , (b) Ru/ $\text{Fe}_3\text{O}_4$ , (c) Rh/ $\text{Fe}_3\text{O}_4$ , (d) Pt/ $\text{Fe}_3\text{O}_4$ . The Fermi level is set to be zero with a dashed line as a guide.

Table S1. DFT calculated d-band centers (eV) of different noble metals introducing into the  $\text{Fe}_3\text{O}_4$  (111) surface; the reference energy level is vacuum.

|                | Ir    | Ru    | Rh    | Pt    | Pd    |
|----------------|-------|-------|-------|-------|-------|
| d-band center  | -3.49 | -3.61 | -3.87 | -4.62 | -3.21 |
| $\Delta Q$ (e) | 0.64  | 1.12  | 0.63  | 0.53  | 0.52  |

Table S2. DFT calculated energy of HOMO and LUMO for free hydrogen molecules; the reference energy level is vacuum.

| Free $\text{H}_2$ molecule |        |
|----------------------------|--------|
| HOMO (eV)                  | -10.33 |
| LUMO (eV)                  | -0.03  |

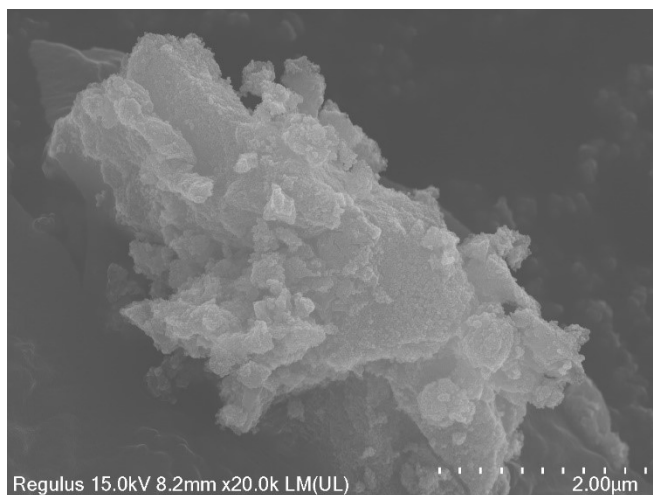

Figure S3. SEM image of as prepared pristine Fe<sub>2</sub>O<sub>3</sub>/ZrO<sub>2</sub>.

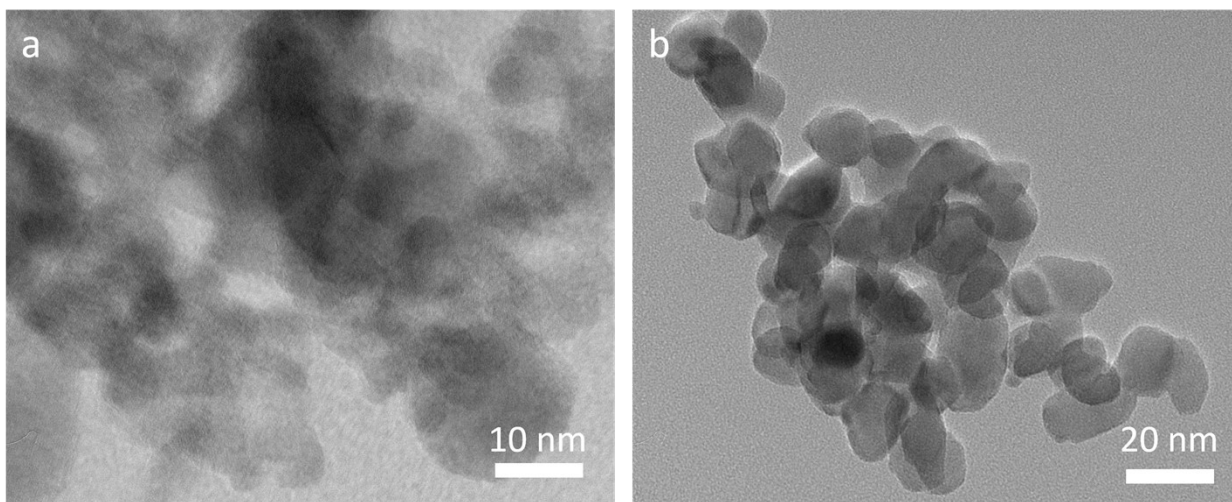

Figure S4. TEM images of (a) pristine Fe<sub>2</sub>O<sub>3</sub>/ZrO<sub>2</sub>, (b) Ir-Fe<sub>2</sub>O<sub>3</sub>/ZrO<sub>2</sub>.

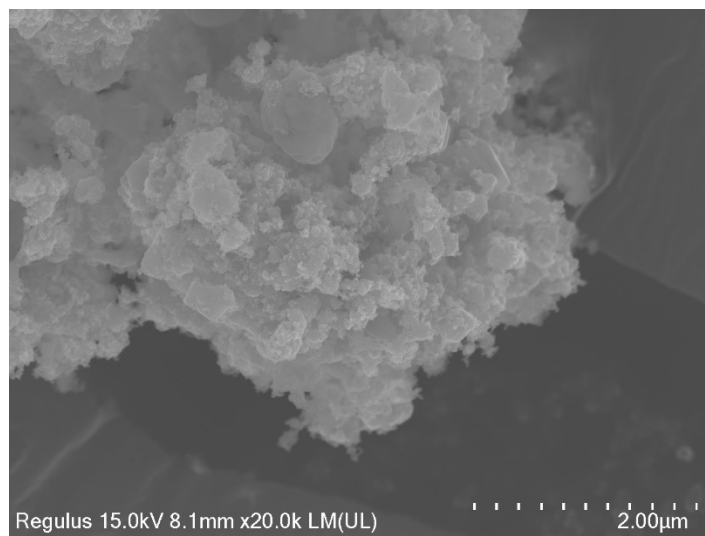

Figure S5. SEM image of Ir-Fe<sub>2</sub>O<sub>3</sub>/ZrO<sub>2</sub> after 100 cycles testing.

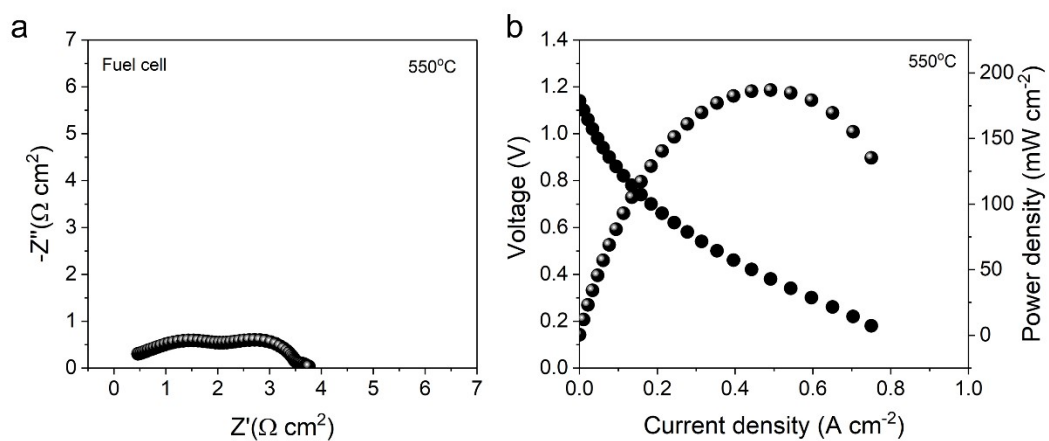

Figure S6. (a) EIS spectrum of reversible solid oxide fuel cell; (b) I-V and corresponding I-P curves of reversible solid oxide fuel cell.

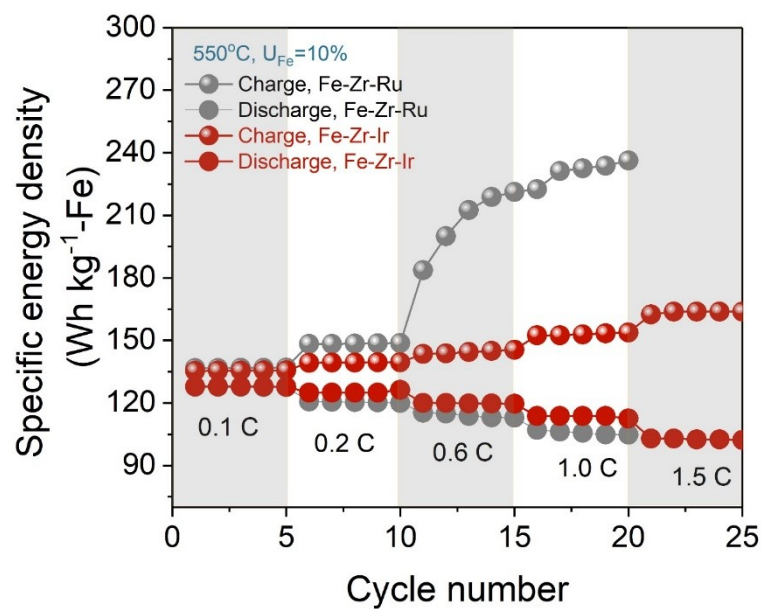

Figure S7. Comparison of specific energy density at different current densities for Ir-and Ru- $Fe_2O_3/ZrO_2$  energy storage materials.

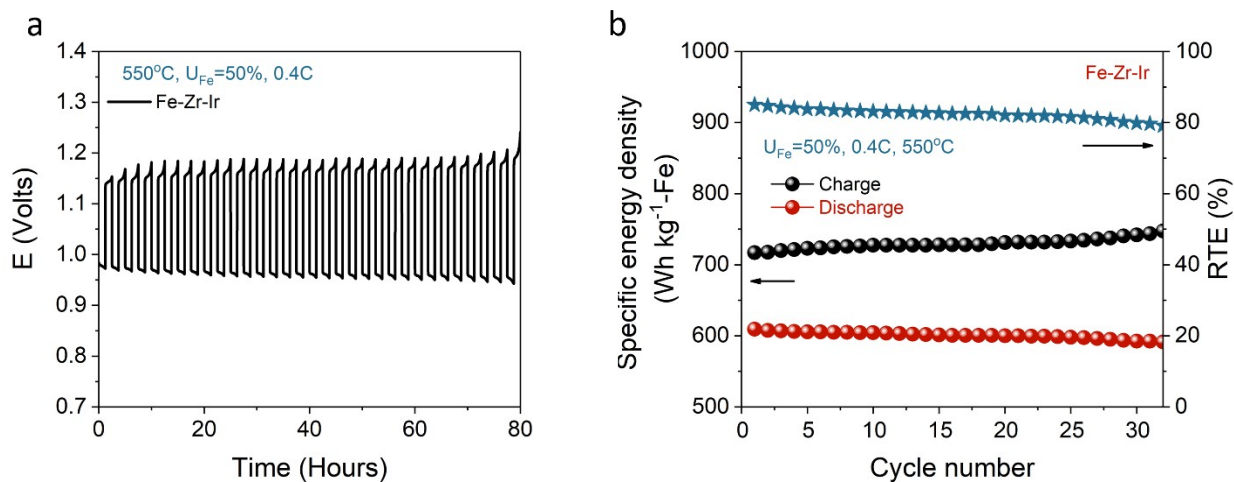

Figure S8. Cycling performance of SOIAB with 0.4C (20mA/cm<sup>2</sup>) and  $U_{Fe}=50\%$ : (a) voltage profiles; (b) the corresponding specific energy density and round-trip efficiency.

Table S3. Valence electron configurations of different metals and O adopted in this work.

| Element          | Fe                              | Ir                              | Pt                              | Ru_pv                                           | Rh_pv                                           | Pd                              | O                               |
|------------------|---------------------------------|---------------------------------|---------------------------------|-------------------------------------------------|-------------------------------------------------|---------------------------------|---------------------------------|
| Valence electron | 3d <sup>7</sup> 4s <sup>1</sup> | 6s <sup>1</sup> 5d <sup>8</sup> | 6s <sup>1</sup> 5d <sup>9</sup> | 4p <sup>6</sup> 5s <sup>1</sup> 4d <sup>7</sup> | 4p <sup>6</sup> 5s <sup>1</sup> 4d <sup>8</sup> | 5s <sup>1</sup> 4d <sup>9</sup> | 2s <sup>2</sup> 2p <sup>4</sup> |
| Number           | 8                               | 9                               | 10                              | 14                                              | 15                                              | 10                              | 6                               |
